# Supplementary material for: CDX2 is essential for cell proliferation and polarity in porcine blastocysts
Source: Oxford University Press journal article supplement (doi:10.1242/dev.141085), 2017-02-21
Supplement: dev141085supp.pdf [file dev141085supp.pdf]

## Supplementary Information

## Supplementary Figures:

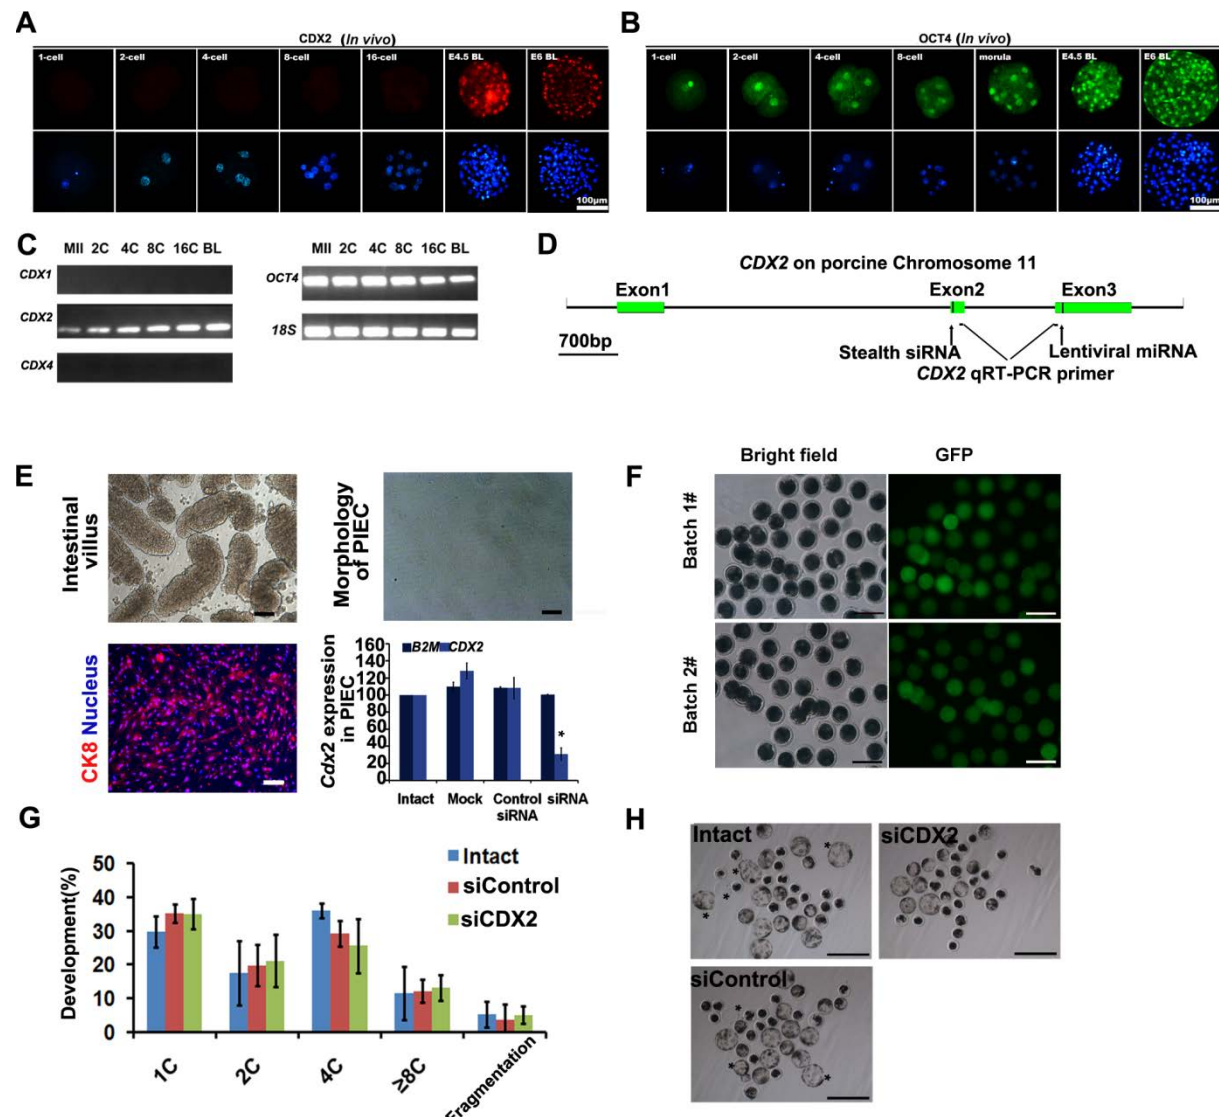

**Fig. S1 The effects of *CDX2* knockdown on porcine embryonic development.** (A-B) IF assays shows the *in vivo* expression pattern of (A) *OCT4* (green) and (B) *CDX2* (red). (C) RT-PCR proved the *CDX2* and *OCT4* mRNA expression throughout the development and the absence of *CDX1* and *CDX4* expression in porcine early stage embryos. (D) Illustration of locus targeted by *CDX2* interfering tools and primers for qPCR. This study used two methods to knockdown *CDX2*: Stealth siRNA injection in zygotes and miRNA- expressing lentivirus mediated *CDX2* knockdown. “Stealth siRNA” and “Lentiviral miRNA”

labeled their target locus. (E) Stealth siRNA also could effectively repress CDX2 expression in porcine intestinal epithelial cells (PIEC). Bar, 100 $\mu$ m. (F) Injection of GFP mRNA into porcine zygotes has shown that our injection efficiency is close to 100%. Bar, 100 $\mu$ m. (G) The morphology of embryos at D6.5. Bar, 500 $\mu$ m. (H) Embryonic development at D3.

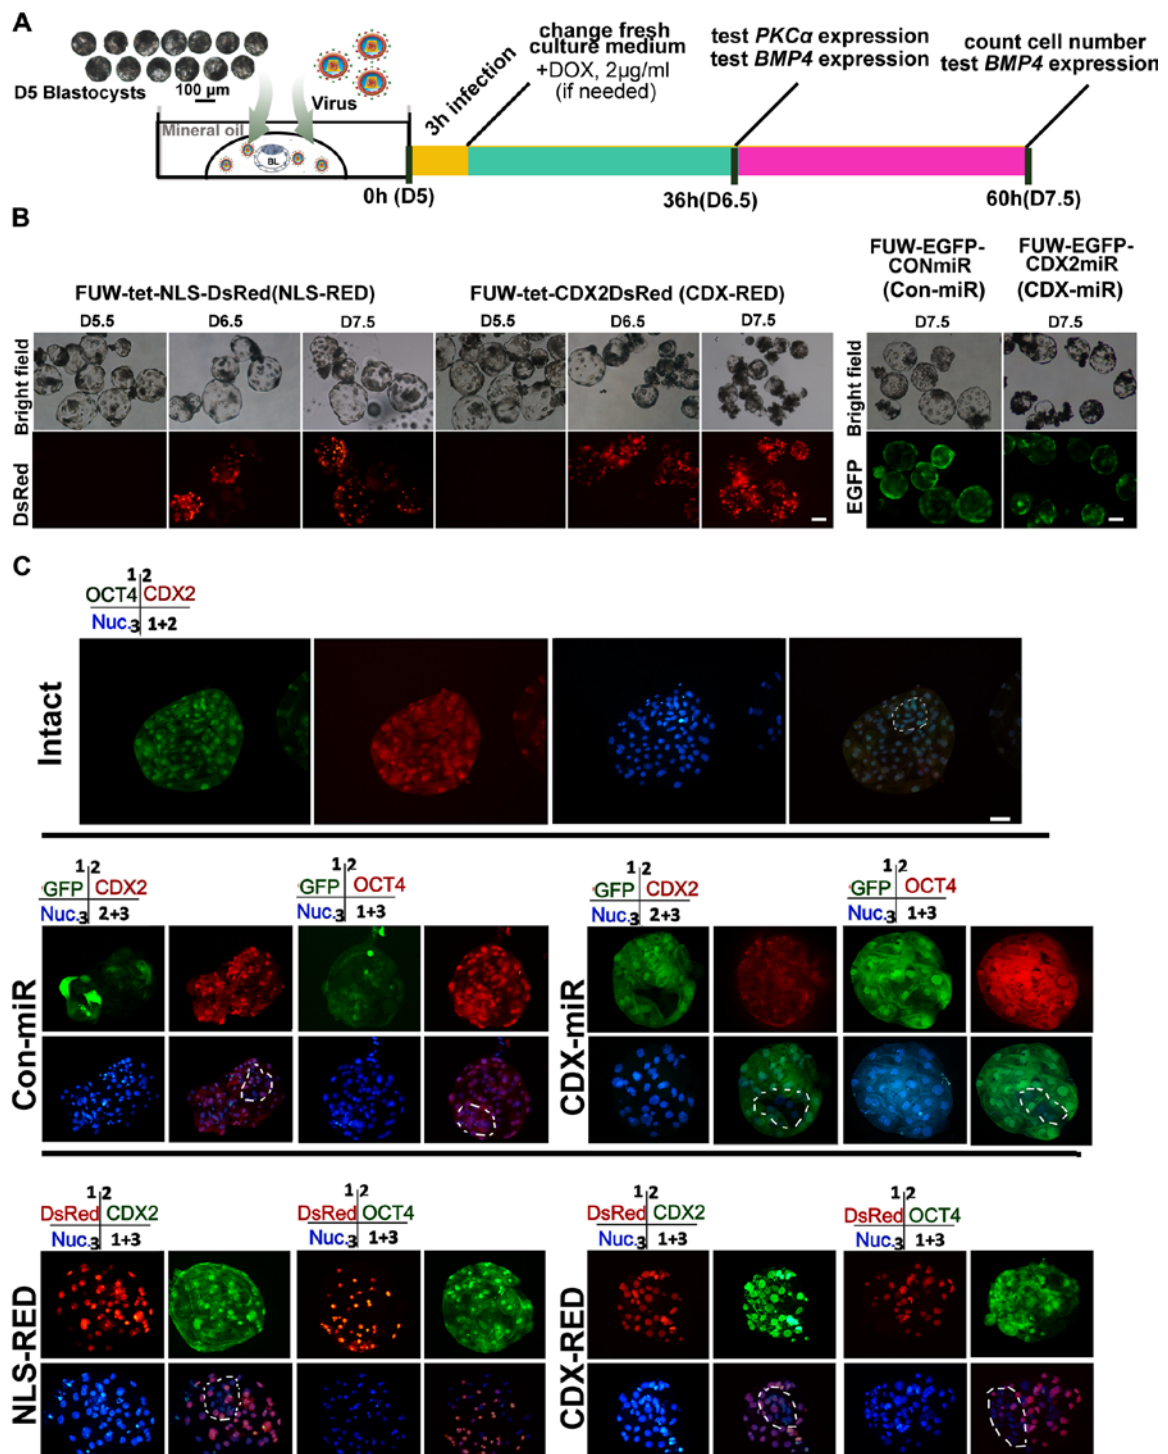

**Fig. S2 Lentivirus mediated TE specific *CDX2* regulation.** (A) The procedure of lentivirus infection and following experiments. (B) The status of blastocysts after lentivirus transfection. (C) IF assay shows the *CDX2* and *OCT4* expression after TE specific lentivirus infection. Bar, 50 μm.

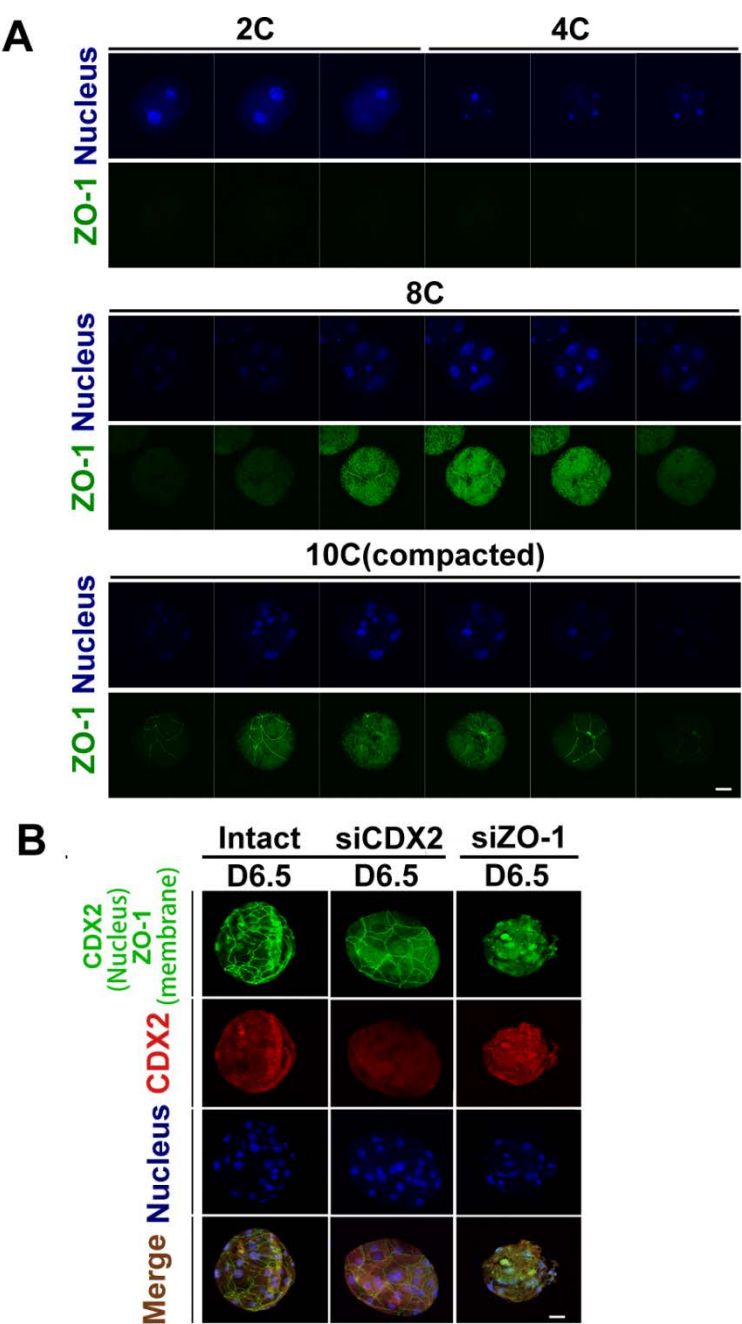

**Fig. S3 CDX2 expression and the tight junction formation are independent events.** (A) IF assay against ZO-1 in cleavage stage porcine embryos indicates that the formation of tight junction in porcine embryos is earlier than the CDX2 accumulation. (B) IF results show that the formation of tight junction (marked by ZO-1) and CDX2 expression are independent, because RNA interference against each of them does not affect the another one. Bar, 50µm.

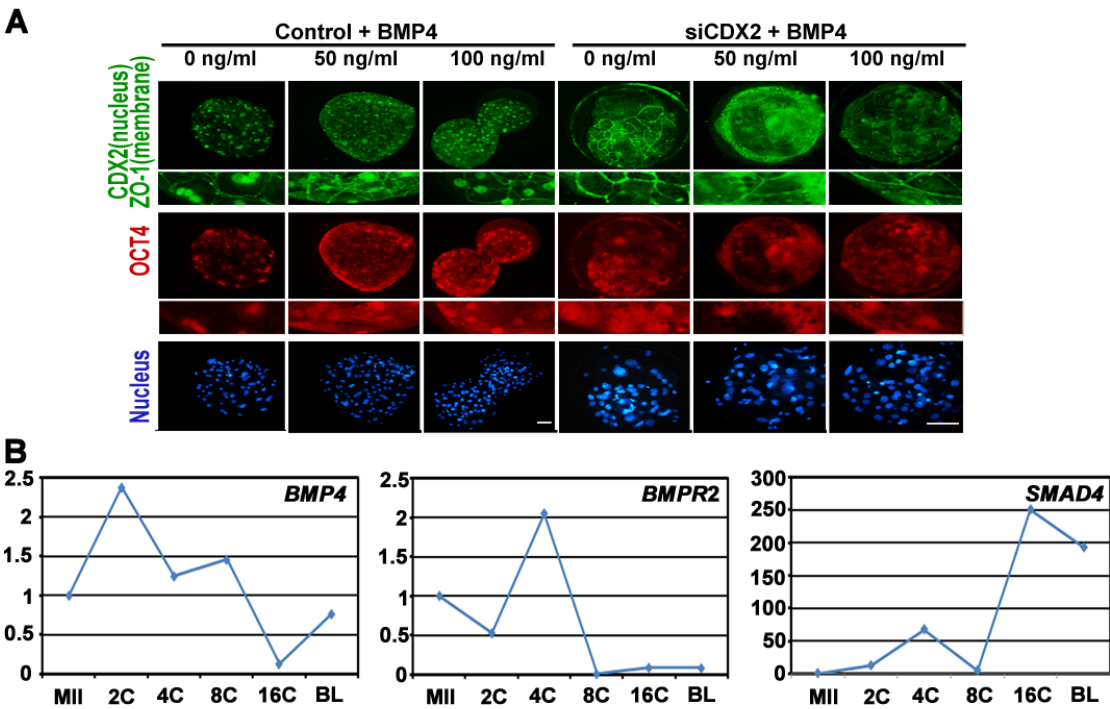

**Fig. S4 BMP4 signaling is active in porcine blastocysts.** (A) IF assay was used to calculate the blastocyst cell numbers after BMP4 supplement and at the same time prove CDX2 absence in siCDX2 blastocysts. Bar, 50µm. (B) The mRNA expression patterns of *BMP4*, *Smad4* and *BMPR2* throughout early porcine embryo.

**Supplementary Tables:****Table S1. Primers used for qPCR**

| Gene          | GeneBank No.(Ensemble ID) | Primer pairs                                                              |
|---------------|---------------------------|---------------------------------------------------------------------------|
| <i>CDX2</i>   | AM778830                  | F: 5'AGTCGCTACATCACCATTTCGGAG3'<br>R: 5'GCTGCTGTTGCTGCAACTTCTTC3 '        |
| <i>POU5F1</i> | NM_001113060              | F:<br>5'GAAGCTGGACAAGGAGAAGCTGGAG3 '<br>R: 5'ATGGTCGTTTGGCTGAACACCTTC3 '  |
| <i>NANOG</i>  | AY596464                  | F: 5'CCTCCATGGATCTGCTTATTC3 '<br>R: 5'CATCTGCTGGAGGCTGAGGT 3 '            |
| <i>SOX2</i>   | NM_001123197              | F: 5'AACCAGAAGAACAGCCCAGAC3 '<br>R: 5'TCCGACAAAAGTTTCCACTCG3 '            |
| <i>GATA4</i>  | NM_214293                 | F: 5'ATGAAGCTCCATGGTGTCCC 3 '<br>R: 5'ACTGCTGGAGTTGCTGGAAG3 '             |
| <i>GATA6</i>  | NM_214328                 | F: 5'TTGGTTATTCCCGAATTTCTCCG3 '<br>R: 5'CATTCTGCAAACCTGGGTGATAC3 '        |
| <i>CDH1</i>   | NM_001163060.1            | F: 5'TGCTGCTCCTGCTCCTTATTCG3 '<br>R: 5'CTGGTCCTCTTCTCCACCTCCT3 '          |
| <i>ZO-1</i>   | AJ318101.1                | F: 5'AGTGGCGTTGACACGTTCTCTG3 '<br>R: 5'ACCACGGTGTGACCATCCTCAT3 '          |
| <i>PRKCA</i>  | XM_005668672.1            | F: 5'GGAGACAGCCTTCCAACAACCT3 '<br>R: 5'TGTCGGCGAGCATCACCTTC3 '            |
| <i>ATP1B1</i> | AJ401029.1                | F: 5'TGTGCCCAGCGAACTCAAAGAA3 '<br>R: 5'CCAACCATTCGAGCCTGAACCT3 '          |
| <i>EOMES</i>  | XM_003132081.2            | F: 5'TGGACTCAATCCTACTGCCCACTAC3 '<br>R: 5'TTTGCCGCAGGTCACCCACTT3 '        |
| <i>ELF5</i>   | NM_001243711.1            | F: 5'TCCTCCAGAACATTCGCTCACAAG3 '<br>R:<br>5'TGATGAGAACTTTGGAGGCTTGTTTC3 ' |
| <i>CDH3</i>   | (ENSSSCT00000026686.1)    | F: 5'GTCACAGACCAGAACGACCACAAG3 '<br>R: 5'CATCGTCCTCATCGGTGGCTGT3 '        |
| <i>HAND1</i>  | NM_001014428.1            | F: 5'CCGAGCTGCGCGAGTGCAT3 '<br>R: 5'TTGGCCAGCACGTCCATCAGGT3 '             |
| <i>GCM1</i>   | XM_001927486.5            | F: 5'CCTTTCTCCTCACCTATACCTCTC3 '<br>R:                                    |



**Table S2. Antibodies Used for IF and WB assays**

| Primary antibody                                                                                 |                        |                           |                                                                             |
|--------------------------------------------------------------------------------------------------|------------------------|---------------------------|-----------------------------------------------------------------------------|
| Immunogen                                                                                        | Source                 | Dilution                  | Description                                                                 |
| a peptide mapping near the N-terminus of Oct-3/4 of human origin                                 | sc-8628<br>Santa Cruz  | IF:1:50                   | OCT4, Goat polyclonal IgG                                                   |
| human CDX2 recombinant protein                                                                   | ab-88129<br>Abcam      | IF:1:50<br>WB:1:500       | CDX2, Rabbit monoclonal IgG                                                 |
| Human E-Cadherin                                                                                 | ab-1416<br>Abcam       | IF:1:50                   | E-CADHERIN, Mouse monoclonal IgG1                                           |
| Human ZO-1                                                                                       | 339188<br>Invitrogen   | IF:1:500                  | Mouse monoclonal antibody conjugated to Alexa Fluor 488                     |
| A synthetic peptide corresponding to internal region of human NANOG                              | PAB6837<br>Abnova      | IF:1:50                   | NANOG, Goat polyclonal                                                      |
| a peptide mapping near the C-terminus of Sox-2 of human origin                                   | sc-17320<br>Santa Cruz | IF:1:100                  | SOX2, Goat polyclonal IgG                                                   |
| peptide region of the Human ZFP42 protein sequence according to NP_777560                        | SAB210276<br>9 Sigma   | IF:1:100                  | ZFP42(REX1), Rabbit polyclonal                                              |
| Human Cytokeratin-18                                                                             | BM0032<br>Boster       | IF:1:100                  | CK8, Mouse monoclonal IgG                                                   |
| a peptide from the p17 fragment corresponding to the cleaved region of caspase-3 human caspase-3 | G7481<br>Promega       | IF:1:500                  | Active- CASPASE3, Rabbit polyclonal                                         |
| synthesized peptide derived from human Catenin- $\beta$                                          | SAB450054<br>3 Sigma   | IF:1:100                  | endogenous levels of total CATNB (Catenin- $\beta$ ), Rabbit polyclonal IgG |
| the C-terminus of PKC $\zeta$ of rat origin                                                      | sc-216<br>Santa Cruz   | IF:1:50                   | PKC $\zeta$ , Rabbit polyclonal IgG                                         |
| residues surrounding Thr567 of human ezrin,                                                      | 3149P<br>CST           | IF:1:500<br>WB:1:100<br>0 | Phospho-Ezrin (Thr567), Rabbit monoclonal IgG                               |
| amino acids 311-586 mapping at the C-terminus of human Ezrin                                     | sc-20773<br>Santa Cruz | IF:1:500<br>WB:1:100<br>0 | Total Ezrin, Rabbit polyclonal IgG                                          |
| the C-terminus of PKC $\alpha$ of human origin                                                   | sc-208<br>Santa Cruz   | IF:1:500<br>WB:1:100      | PKC $\alpha$ , Rabbit polyclonal IgG                                        |

| Secondary antibody                                                                                                                                                                                                                                                                                          |                        |
|-------------------------------------------------------------------------------------------------------------------------------------------------------------------------------------------------------------------------------------------------------------------------------------------------------------|------------------------|
| Name                                                                                                                                                                                                                                                                                                        | Source                 |
| Alexa Fluor 546 Donkey Anti-Rabbit IgG                                                                                                                                                                                                                                                                      | Molecular Probe A10040 |
| Alexa Fluor 546 Donkey Anti-Mouse IgG                                                                                                                                                                                                                                                                       | Molecular Probe A10036 |
| Alexa Fluor 546 Donkey Anti-Goat IgG (H+L)                                                                                                                                                                                                                                                                  | Molecular Probe A11056 |
| Alexa Fluor 488 Donkey Anti-Goat IgG (H+L)                                                                                                                                                                                                                                                                  | Molecular Probe A11055 |
| Alexa Fluor 488 Donkey Anti-Rabbit IgG (H+L)                                                                                                                                                                                                                                                                | Molecular Probe A21206 |
| Alexa Fluor 488 Donkey Anti-Mouse IgG (H+L)                                                                                                                                                                                                                                                                 | Molecular Probe A21202 |
| Anti-Rabbit IgG (whole molecule) – Peroxidase antibody produced in goat                                                                                                                                                                                                                                     | Sigma A9169            |
| Anti-Mouse IgG (whole molecule) – Peroxidase antibody produced in rabbit                                                                                                                                                                                                                                    | Sigma A9044            |
| <p><b>Note</b> Commercial antibodies have been tested and found to not work in pig including :</p> <p>OCT4: sc-8629 Santa Cruz; O8389 Sigma</p> <p>CDX2: AB4123 Millipore; 3977S Cell Signaling</p> <p>NANOG: sc-33760 Santa Cruz; ab21624 Abcam</p> <p>SOX2: ab97959 Abcam</p> <p>ZFP42: ab50828 Abcam</p> |                        |
